# Supplementary material
Source: MDPI journal article supplement (https://www.mdpi.com/2076-3417/13/1/463)
Supplement: s1 [file s1]

Article

# Different Drying Techniques Can Affect the Adsorption Properties of Agarose-Based Gels for Crystal Violet Removal

Mariangela Guastaferrero<sup>1</sup>, Lucia Baldino<sup>1,2,\*</sup>, Stefano Cardea<sup>1,\*</sup> and Ernesto Reverchon<sup>1,2</sup>

<sup>1</sup> Department of Industrial Engineering, University of Salerno, Via Giovanni Paolo II, 132, 84084 Fisciano, SA, Italy

<sup>2</sup> C.U.G.R.I., InterUniversity Research Center for the Prediction and Prevention of Major Hazards, University of Salerno, Via Giovanni Paolo II, 132, 84084 Fisciano, SA, Italy

\* Correspondence: lbaldino@unisa.it (L.B.); scardea@unisa.it (S.C.)

## Supplementary Materials

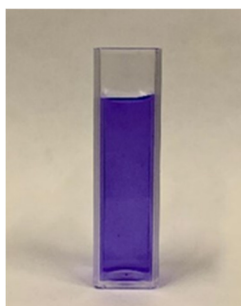

(a)

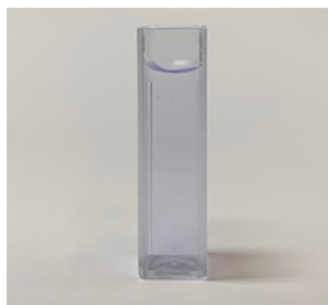

(b)

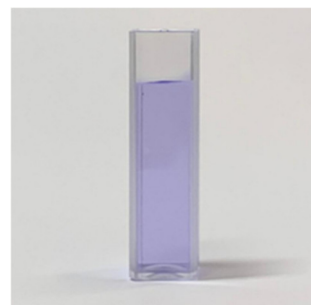

(c)

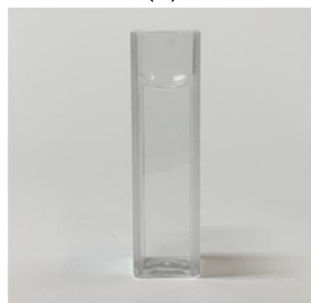

(d)

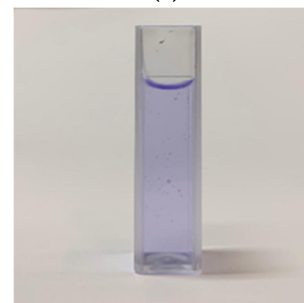

(e)

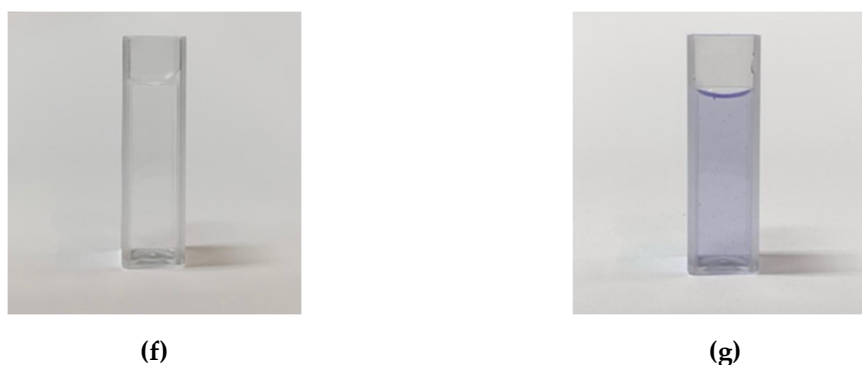

**Figure S1.** Image of CV solution before the adsorption process (a); images of CV solution after 8 steps of filtration for 100 mg of aerogel (b) and 100 mg of cryogel (c); images of CV solution after 8 steps of filtration for 200 mg of aerogels (d) and 200 mg of cryogel (e); images of CV solution after 8 steps of filtration for 300 mg of aerogel (f) and 300 mg of cryogel (g).
